# Supplementary material for: WAKE-mediated modulation of cVA perception via a hierarchical neuro-endocrine axis in Drosophila male-male courtship behaviour
Source: PubMed Central journal article supplement (PMC9076693; doi:10.1038/s41467-022-30165-2), 2022-05-06
Supplement: 41467_2022_30165_MOESM2_ESM.pdf [file 41467_2022_30165_MOESM2_ESM.pdf]

The legends for Supplementary Data:

**Supplementary Data 1.** The genotypes and behavior-analytical sample sizes used in each Figure

**Supplementary Data 2.** The sequence of the knock-in cassette is displayed and coloured as specified to indicate the different segments.

**Supplementary Data 3.** DNA sequence synthesized for *LexAop-wake<sup>mir</sup>* generation. *KpnI* restriction sites are indicated using boxes.

**Supplementary Data 4.** DNA sequence synthesized for *UAS-wake-RG<sub>HA</sub>* generation. *KpnI* restriction sites are indicated using boxes. The HA epitope tag coding region is underlined, and the start and stop codons are indicated in bold.

The legends for Supplementary Video:

**Supplementary Movie 1.** This movie shows examples of a *wake<sup>32099</sup>* male courting a wild type 2U male, as referred to in [Figure 1b](#).

**Supplementary Movie 2.** This movie shows examples of *wake<sup>32099</sup>* males forming courtship chains, as referred to in [Figure 1c](#).

**Supplementary Movie 3.** This movie shows examples of *wake<sup>32099</sup>/wake<sup>GS17103</sup>* trans-heterozygous males forming courtship chains, as referred to in [Figure 1c](#).
