# Supplementary material for: WAKE-mediated modulation of cVA perception via a hierarchical neuro-endocrine axis in Drosophila male-male courtship behaviour
Source: PubMed Central journal article supplement (PMC9076693; doi:10.1038/s41467-022-30165-2), 2022-05-06
Supplement: 41467_2022_30165_MOESM4_ESM.pdf [file 41467_2022_30165_MOESM4_ESM.pdf]

1 nnnn: vector backbone  
2 NNN: homology arm/intergenic region  
3 NNN: homology arm/coding region  
4 NNN: attP  
5 NNN: Gal4  
6 NNN: mini-white

7  
8 GTCCGAACAACATGGTCATAGTGCAGGTATTATAGTGTAAAAGCCAAAAGTGAGAAAACCA  
9 GCAGCCAAAGGACTACGCCACGAGCATACAAATGCCAGCCATGCCGTCGCAACTTGTGATA  
10 AGCGGCACCGCCGGCTTACCAGCAAATAAACAGCGAACACAGGGACACCAGCCAGCAAAC  
11 TCGAGACGCAGCAGCAGCAAACGCAGCAGGATACCAGCCAGGAGCAGCAGCAGCAGCA  
12 GCAGCATCAGCATTCGCACAGCCAACTctagaCCCAGGTCAGAAGCGGTTTTCGGGAGTAG  
13 TGCCCCAACTGGGGTAACTTTTGAGTTCTCTCAGTTGGGGGCGTAGGGTCGCCGACATGAC  
14 ACAAGGGGTTagatctATGAAGCTGCTGAGTAGTATTGAACAAGCGTGTGACATATGCCGA  
15 CTTAAGAAGCTGAAGTGCAGCAAGGAAAAGCCGAAGTGCGCCAAATGTCTTAAGAACAATT  
16 GGGAGTGCCGGTACTCGCCAAAGACGAAGCGAAGCCCTTTGACACGCGCTCATTTGACTGA  
17 AGTGGAGAGTCGCCTGGAGCGCCTTGAGCAGTTGTTCCCTCCTCATTTTTCCCGTGAAGAC  
18 CTCGACATGATACTGAAGATGGATAGTCTCCAAGATATTAAGGCCCTGCTCACTGGCCTGT  
19 TTGTTCAGGATAACGTCAACAAGGATGCCGTGACGGACCGCCTTGCCCTCGGTGGAGACAGA  
20 TATGCCACTTACCTTGCGGCAGCATCGCATCTCGGCTACCAGCAGTAGTGAAGAAAGTTCC  
21 AATAAGGGTCAACGGCAACTGACGGTATCGATCGACAGTGCGGCCACCACGACAACAGCA  
22 CCATTCCACTGGACTTCATGCCTCGTGACGCACTGCATGGATTTGACTGGAGCGAGGAGGA  
23 TGATATGAGCGACGGACTCCCATTCCTGAAGACCGACCCCAATAACAATGGTTTCTTTGGC  
24 GACGGCAGCCTGCTGTGTATCCTGCGAAGTATTGGTTTTAAGCCGGAAAATTACACGAACA  
25 GTAATGTCAATCGTCTTCCCACAATGATCACCGACCGTTACACGCTGGCCAGTCGCAGTAC  
26 TACAAGCCGCCTGCTGCAAAGCTATCTTAACAACCTCCACCCCTACTGCCCCATAGTGCAT  
27 AGTCCTACTCTCATGATGCTTTACAACAATCAGATTGAGATAGCATCGAAGGACCAGTGGC  
28 AGATCCTCTTCAACTGCATTCTCGCCATCGGGCCTTGGTGTATTGAAGGCGAGAGCACAGA  
29 TATCGACGTGTTTTACTATCAAAACGCCAAGTCGCACCTCACCTCGAAGGTCTTCGAAAGT  
30 GGAAGCATTATCCTCGTGACAGCCCTCCATCTGCTGAGTCGTTATACCCAGTGGCGTCAGA  
31 AAATAACATCCTACAACCTTTCATTCGTTTCAGCATTTCGGATGGCGATTAGCCTGGGACT  
32 TAATCGTGACCTCCCAAGTAGCTTCAGCGATTTCGTCGATCCTGGAACAGCGCCGGAGGATT  
33 TGGTGGAGTGTGTACAGCTGGGAGATCCAGCTGTCCCTCTTGTACGGACGCAGCATTACAGC  
34 TGAGTCAGAACACGATTTCCCTTCCCGTCCAGCGTGGACGACGTTCAACGGACAACACTACGGG  
35 CCCGACCATCTACCACGGTATCATTGAGACGGCCCGCTTGCTTCAAGTGTTTTACGAAGATT  
36 TATGAGCTGGATAAGACAGTGACCGCGGAGAAGAGTCCGATCTGCGCCAAGAAATGCCTGA  
37 TGATCTGCAATGAGATAGAGGAGGTGAGCCGCCAGGCACCCAAGTTCCCTGCAGATGGACAT  
38 AAGCACTACGGCGCTGACTAATCTCCTCAAAGAACACCCCTGGCTGAGTTTTACCCGCTTC  
39 GAGCTGAAGTGGAAACAGCTGAGTCTGATTATATACGTTTTGCGGGACTTTTTACAAATT  
40 TTACGCAGAAGAAGTCGCAGCTTGAACAAGATCAGAACGACCATCAGTCTACGAGGTAAA  
41 GAGGTGCAGCATAATGCTCTCCGACGCAGCCAGCGCACCGTGATGTGCGGTGTCGTCCTAT  
42 ATGGACAACCATAATGTGACCCCTTATTTGCCTGGAATTGCTCCTACTATTTGTTCAACG  
43 CCGTGTGGTCCCAATCAAGACTCTTCTGAGCAACTCCAAATCGAACGCCGAGAATAACGA  
44 GACAGCACAGCTCTTGACGCAAATTAACACCGTGTGATGCTGTTGAAGAAACTCGCTACA  
45 TTCAAGATTCAGACTTGCGAAAAGTACATCCAGGTGTTGGAAGAGGTGTGCGCCCCATTCC  
46 TTCTTTTCGCAATGCGCAATTCCTCCCGCACATAAGTTACAATAATTCACACGGCTCCGC  
47 TATCAAGAATATCGTTCGGCTCCGCTACAATCGCGCAGTATCCACGCTGCCTGAGGAAAAT  
48 GTTAACAACATATCGGTGAAGTATGTAAGTCCAGGCAGCGTCGGCCCGAGCCCTGTGCCGC

49 TGAAAAGCGGAGCCTCCTTCAGCGATCTGGTCAAGCTGCTCAGCAACCGCCCACCATCCCG  
50 CAACTCCCCTGTCACTATAACCCCGATCGACCCCGTCGCATCGTAGCGTTACCCCATTCCTG  
51 GGACAACAGCAGCAACTGCAGAGTCTGGTGCCACTTACGCCCTCGGCATTGTTTGGCGGAG  
52 CCAACTTCAACCAGAGTGGAACATTGCGGACAGCTCCTTGAGCTTACGTTTACCAACAG  
53 CTCCAACGGTCCAAACTTGATCACGACTCAGACAAACTCCCAGGCATTGTCCCAGCCCATT  
54 GCCAGCTCGAATGTGCATGATAACTTTATGAATAATGAAATTACTGCCTCCAAGATTGACG  
55 ACGGCAACAACAGCAAGCCCCTTTCCCCAGGCTGGACTGACCAGACGGCCTACAATGCTTT  
56 CGGTATCACCCTGGCATGTTCAACACCACAACGATGGACGACGTATATAACTATCTTTTT  
57 GATGATGAGGATACTCCACCGAACCCAAAGAAGGAGTAGgatctataacttcgtataatgt  
58 atgctatacgaagtattatggtaccttgcatgccccgttattcTCTATTCTCTATTTCGTTTTG  
59 TGACTCTCCCTCTGTACTATTGCTCTCTCACTCTGTGCGACAGTAAACGGCAGCTATT  
60 CTCGTTGCTTCGAGAGAGCGCGCCTCGAATGTTTCGCGAAAAGAGCGCCGGAGTATAAATAG  
61 AGGCGCTTCGTCGACGGAGCGTCAATTCAATTCAAACAAGCAAAGTGAACACATCGCGAAG  
62 CGTAAGCTGAGCAAACAAACAAGCGCAGCTGAACAAGCTAAACAATCTGCAATAAAGTGCA  
63 AGTTAAAGTGAATCAATTAAGTAACCAACAACCAAGTAATTAAGTAAACTAAAACTGCAACT  
64 ACTGAAATCAACCAAGAAGTCATTATTGAAGACAAGAAGAGAACTCTgaataggtcgatag  
65 cgtcaattcggcacgagcgggtttcgtgacgaagctccaagcggtttacgccatcaattaa  
66 caciaagtgctgtgccccaaactcctctcgcttcttatttttGTTTGTTTTTTGAGTGATTG  
67 GGTGGGTGATTGGTTTTGGGTGGGTAAGCAGGGGAAAGTGTGAAAAATCCCGGCAATGGGC  
68 CAAGAGGATCAGGAGCTATTAATTCGCGGAGGCAGCAAACACCCATCTGCCGAGCATCTGA  
69 ACAATGGTGACAGCGGAGCGGCTTCGCAGAGCTGCATTAACCAGGGCTTCGGGCAGGCCAA  
70 AACTACGGCAGCTCCTGCCACCAGTCCGCCGGAGGACTCCGGTTCAGGGAGCGGCCAA  
71 CTAGCCGAGAACCTCACCTATGCCTGGCACAATATGGACATCTTTGGGGCGGTCAATCAGC  
72 CGGGCTCCGGATGGCGGCAGCTGGTCAACCGGACACGCGGACTATTCTGCAACGAGCGACA  
73 CATAACGGCGCCCAGGAAACATTTGCTCAAGAACGTTTGCGGCGTGGCCTATCCGGGCGAA  
74 CTTTTGGCCGTGATGGGCAGTTCCGGTGCCGAAAGACGACCCTGCTGAATGCCCTTGCC  
75 TTCGATCGCCGAGGGCATCCAAGTATCGCCATCCGGGATGCGACTGCTCAATGGCCAACC  
76 TGTGGACGCCAAGGAGATGCAGGCCAGGTGCGCCTATGTCCAGCAGGATGACCTCTTTATC  
77 GGCTCCCTAACGGCCAGGGAACACCTGATTTTCCAGGCCATGGTGCAGGATGCCACGACATC  
78 TGACCTATCGGCAGCGAGTGGCCCGGTGGATCAGGTGATCCAGGAGCTTTCGCTCAGCAA  
79 ATGTCAGCACACGATCATCGGTGTGCCCGGAGGGTGAAAGGTCTGTCCGGCGGAGAAAGG  
80 AAGCGTCTGGCATTGCGCTCCGAGGCACTAACCAGTCCGCCGCTTCTGATCTGCGATGAGC  
81 CCACCTCCGGACTGGACTCATTTACCGCCACAGCGTCTGTCAGGTGCTGAAGAAGCTGTC  
82 GCAGAAGGGCAAGACCGTCATCCTGACCATTATCAGCCGTCTTCCGAGCTGTTTGGAGCTC  
83 TTTGACAAGATCCTTCTGATGGCCGAGGGCAGGGTAGCTTTCTTGGGCACTCCCAGCGAAG  
84 CCGTGCAGTCTTTTCTACGTGGGTGCCAGTGTCTACCAACTACAATCCGGCGGACTT  
85 TTACGTACAGGTGTTGGCCGTTGTGCCCGGACGGGAGATCGAGTCCCGTGATCGGATCGCC  
86 AAGATATGCGACAATTTTGCCATTAGCAAAGTAGCCCGGATATGGAGCAGTTGTTGGCCA  
87 CCAAAAATTTGGAGAAGCCACTGGAGCAGCCGGAGAATGGGTACACCTACAAGGCCACCTG  
88 GTTCATGCAGTTCCGGGCGGTCTGTGGCGATCCTGGCTGTGCGGTGCTCAAGGAACCACTC  
89 CTCGTAAGAGTGCAGCTTATTCAGACAACGATGGTTGCCATCTTGATTGGCCTCATCTTTT  
90 TGGGCAACAACCTCACGCAAGTGGGCGTGATGAATATCAACGGAGCCATCTTCTCTTCT  
91 GACCAACATGACCTTTCAAACGTCTTTGCCACGATAAATGTGTTACCTCAGAGCTGCCA  
92 GTTTTTATGAGGGAGGCCCGAAGTCGACTTTATCGCTGTGACACATACTTTCTGGGCAAAA  
93 CGATTGCCGAATTGCCGCTTTTTCTCACAGTGCCACTGGTCTTACGGCGATTGCCTATCC  
94 GATGATCGGACTGCGGGCCGGAGTGCTGCACTTCTTCAACTGCCTGGCGCTGGTCACTCTG  
95 GTGGCCAATGTGTCAACGTCCTTCGGATATCTAATATCCTGCGCCAGCTCCTCGACCTCGA

96 TGGCGCTGTCTGTGGGTCCGCCGTTATCATAACCATTCCTGCTCTTTGGCGGCTTCTTCTT  
97 GAACTCGGGCTCGGTGCCAGTATACCTCAAATGGTTGTCGTACCTCTCATGGTTCCGTTAC  
98 GCCAACGAGGGTCTGCTGATTAACCAATGGGCGGACGTGGAGCCGGGCGAAATTAGCTGCA  
99 CATCGTCGAACACCACGTGCCCCAGTTCGGGCAAGGTCATCCTGGAGACGCTTAACTTCTC  
100 CGCCGCCGATCTGCCGCTGGACTACGTGGGTCTGGCCATTCTCATCGTGAGCTTCCGGGTG  
101 CTCGCATATCTGGCTCTAAGACTTCGGGCCCCGACGCAAGGAGTAGCCGACATATATCCGAA  
102 ATAAGTGTGTTTTTTTTTTTTTTTACCATTATTACCATCGTGTTTACTGTTTATTGCCCCCT  
103 CAAAAAGCTAATGTAATTATATTTGTGCCAATAAAAAACAAGATATGACCTATAGAATACAA  
104 AAAAAAAAAAAAAAAAAAAAAAAAAAactcgaagggggcccggtgcagataacttcgtataat  
105 gtatgctatacgaagttatgctagcAACCCTTGTGTCATGTCGGCGACCCTACGCCCCCA  
106 ACTGAGAGAACTCAAAGGTTACCCAGTTGGGGCACTACTCCCAAAACCGCTTCTGACCT  
107 GGGctcgagggcgcgAGGTCCTGCAAAGAAAAGCGGCACCACCCTATCCGTCGACCGGGCC  
108 GCCTTCCTTTTGTGTCGCGTCAAGAAAGTGTTCAGAAGAAGCGACAGCAGCGCAAGGAGC  
109 GACA

111 **Supplementary Data 2.** The sequence of the knock-in cassette is displayed and coloured as  
112 specified to indicate the different segments.
