# Supplementary material for: WAKE-mediated modulation of cVA perception via a hierarchical neuro-endocrine axis in Drosophila male-male courtship behaviour
Source: PubMed Central journal article supplement (PMC9076693; doi:10.1038/s41467-022-30165-2), 2022-05-06
Supplement: 41467_2022_30165_MOESM5_ESM.pdf [file 41467_2022_30165_MOESM5_ESM.pdf]

1 GGTACCCGCCAGATCTTTTAAAGTCCACAACCTCATCAAGGAAAATGAAAGTCAAAGTTGGCAGC  
2 TTACTTAAACTTAATCACAGCCTTTAATGTCAAATTGCTGCATCAATCACGCTAAGTTAATATA  
3 CCATATCTAGCTTGATTGATGCAGCAATTTGGTA<sub>g</sub>CTAAAGTGCCTAACATCATTATTTAATTT  
4 TTTTTTTTTTTGGCACACGAATAACCATGCCGTTTTGGATCTTTTAAAGTCCACAACCTCATCAA  
5 GGAAAATGAAAGTCAAAGTTGGCAGCTTACTTAAACTTAATCACAGCCTTTAATGTAAGCTGAC  
6 CAGAATCATAACCGTAAGTTAATATAACCATATCTACGTTTATGATTCTGGTCAGCTTGTACCTA  
7 AAGTGCCTAACATCATTATTTAATTTTTTTTTTTTTTTTTGGCACACGAATAACCATGCCGTTTTGG  
8 ATCCGTGGTACC

9 **Supplementary Data 3.** DNA sequence synthesized for *LexAop-wake<sup>mir</sup>* generation. *KpnI*  
10 restriction sites are indicated using boxes.
