# Supplementary material for: WAKE-mediated modulation of cVA perception via a hierarchical neuro-endocrine axis in Drosophila male-male courtship behaviour
Source: PubMed Central journal article supplement (PMC9076693; doi:10.1038/s41467-022-30165-2), 2022-05-06
Supplement: 41467_2022_30165_MOESM6_ESM.pdf [file 41467_2022_30165_MOESM6_ESM.pdf]

1 GGTACC**ATG**GAGCAGGATGCCGCAGCAGGTCTTGCAAAGAAAAGCGGCACCACCCTATCCGTCCG  
2 ACCGGGCCCGCCTTCTTTTGTCTGCGCGTCAGGAAAGTGTTCAAGAAGAAGCGACAGCAGCGCAA  
3 GGAGCGACAAGCCCAGCAAAGTGCCGCCGCGAGCGGCGAGTGGTGCCGGCGGTGCGGGTGGTGCC  
4 GGTGGTGGTGGCGGTGGCTCCGGGTACAAATCGCGACCAGGCAGCCGGAAGCTGCCGCCGCCAT  
5 TGTTACGGTTCGCGCACACTGCCCGCCATCATTGTGCCAGGACTTCCGGTCTGCTCGCTGCACAC  
6 GGATAAGCAAACATTTAGCTGGACGAACGTTTGTGGGCGAGCAAAGCCGCAGTGGCAGCGCC  
7 AGTGGCCATCGATGGTCGCTGCTCACACGTGCCACCAACAGCAGCAGCATGTGCAGCAACAACA  
8 ACCCGGCCAGCAGTAGCAGCAGCAGCAGCAACAACAATAACAATTTACACATGGCCAACAACAA  
9 TAACACACTGATGGTGAAATCATTGAATTTGCCCAAAGACGATAGCAATTTGGTCTATCGCCGC  
10 AAATCCTCGGGCAGCAGCCCCACCAACATCAGAATGCGCACCATCATCATCAACAGCATCATC  
11 ACCTGCAGCAGCAGCAGCAACAGCAGCAGCAGCATCAGCAGCAGCAACTGCAACAGCAGCAGAT  
12 GCTGCAGCATCTGGGGACAGCTCGCTGTTTCAGCTGTCCGACGATTTGAGTGCCACGCGGAT  
13 GGTTCCTGCTCCTCAGAATTCAGCTCCTCATGTGGTTCGCCGACGAGCCTATCGACTGGCAG  
14 CTCGAAAGCGAGCTGCCGCCTCCTCGGAGGCCTCCACACCGATGACCCGTGAGCACACGCTCCA  
15 CGAGATGCCGCTGGCGGAGTCGGCCTGCTCCGGATCTGCCACTGGTTTCGGGCACGACCTTCACG  
16 CGTCTGGCCAAATTGCTGCATCAATCAAGCACGCTGGCGGGCAGGTCCAATCTGCAGCCACCGC  
17 CCATGGCTGACAATGCGGTCCAGAGCCTGGGCAGAGGATTGGGCCCTGGGACTGGGCGAGGAGGC  
18 GCCACGTCTGTCTGTCTGGGAGAGGCGCAAGGACAGCAGTGTCTGCAGCGTTCGGCCAGCATT  
19 GATTCCTTTGCCGAGATTGTGTTTAGTGAGTCGCCACGCCCTCGCTGGCTGTACAGGGACCAG  
20 GTGCCTGCGCCTCCGCATCCGGCGGCCCTTCGCCATTCAGCAAACGTCCTTCGGCCAGCAGCCT  
21 GTACTCCACCTCAACGTCCAGCTCCTTCGCATCGCAGATGCAGGCCCAGCTGAATGTCAATTAC  
22 GCGACTCGGCACTGGGATCCGGATCAGCAACGGGTGGACCGGGCTCGGGTACCACCATGGGG  
23 CATCTGGTGGCGGCAACGGGGCAGCAGTGCCAGCAGCAGTCGGCGCGAAAGCATGCTCAGCCC  
24 CTCATCCACGCGCCGCTCCAAGCTGACCAGAATCATAAACGCTCTCTTCTCGGCAGTGGAGCAT  
25 GGTACCTGGAGAAGGCGCGCACTATTCTAGAGTCCACCGACGTAGATGTAAACAGCATCAATA  
26 ACGATGGACTATCTGCTCTGGACTTGGCGGTGTTAAGCAATAATCGCTCCATGACCAGGATGCT  
27 GCTTCAGCATGGCGCTGTGGAGGGCTCTCAGTTCTCTGTGGACACCATTGGCACCAAACCTGAAC  
28 GGCTTGCTCAAGGACGCCGAGTCAAGAAATCACGATCTAAGTGGACCGGAGGGCCTCTGTCCGC  
29 CGGTGTGTTGCATCGCGTCCCTCCATCTCGAGCATCATAATTGGCAATTCAGTGCATCGGTAAC  
30 TGGCTGCACGGGCAGCGAGGTGGAAAAACAGATAGGCATCTGGGAGCGCCGAGTTAAGGGACTG  
31 CGTCGCTTGACGCTCGGTTGGGATCAGGCCAGGCCGCCAGATGCACCCGCCTCCGTGGTCTGTCG  
32 ACGTCACTGGCGACAATTCATCAGCGTACAAATCCTAGAGCCCTTCGAGGGGGCCATCGGCAC  
33 GAAATTTAAAGTACAATGGTGCACCCGCGCGGATTTCAACAACGTTGTGGGCGAGAGTGAGCTA  
34 CTGGAATGGATCAGCTTCCATGGCACGATGGGTGCCAGTGTACATATCGGGCCTCACCCAGG  
35 GTCGTCGCTACTTCTGCGAGCCGCGTGGCGCAATGTGAAGGGATGGGGCACCTATCGAACCTC  
36 TGTGCCGGCTAGTGTAGTGCCCTCAACTTGGCGGGATTTAGACAATCGAGAGGACCGATTCTGTG  
37 GGTGCTCACCGAATCCTGGACAATCTATTTACCGCCGTGCGTTTGGCAAGACCCGCCGACGTAT  
38 CCGAGCTGACTTTGGATCCTGCGAGCGCCAAACGACGTAATCCCAAAAAGAAGACTACCATTA  
39 GCAGTTGTTCTCGGTAACCACCAAGTTTCAAAAAGACACTGAGACGCGGCATTTACTTCTTGT  
40 ATTATTCATTGCGATGATAAAGTGCTGGTACCAGCGAAGACTTTCCACCGGTTCATCGAGGTGG  
41 ATGAATCCTATCCGAGTGCTTTGCACATGGATTACTACTGGCTCATGAAAGTTGCCTGCACCTG  
42 GGAGGATGTTAAGTCTCTACGTTCCGATATGGAGCGCAATCTTACCTCCGCTGTTCACTTCCGC  
43 ACTAAGCTTCTATCGGCGGTCTGTGAGATGCAATCGGCACTAGGCATTACGGACTTGGGCAAC  
44 TTTACTATAAACCATTGCGGGATGCTCAGGGCACTGTGGTCTTAACTGTGTGCAGTCCGTA  
45 GAGCCAAAAGGCCGTCTCCATCTTAAACTCGAGATGGGTTCAGTCAGCAAGCTGCAAAAAGAG  
46 CTAGGTGCTCTACACGAGGACTACACCATTAACGAGCTGCTCATCTCCTCGATTGGAGATCAAT  
47 TGCATATCAACAGGCGCGCTGCAGCGTTTGGAGCCCGTCTTACCTGGGCTACCTAAAGAT

48 GCAATGCTCCATAGACCAGATCCAGGTGGTGTGCCCCGTGAAAACGCCGAATGTCTTGCCCCAC  
49 TGCAAGGTGCGCGAAAACAGTCACATCACGGCCGAAGAGTGGCAGGTGCTCCACCGTTACAGTA  
50 GCGATCCTCTACGCCTGCCGTTGGACTTTAGCGCTCAAGGAGGAGATGGAGCCTCCGGAGCAAC  
51 AGCTACTACGGAGGTGCAACGCCTATTTTTATACGATCTCACCAATGCAATGCACAAACTGTTT  
52 GCCAGTATGAACATCAAAATCGCTGATGCAACCACTCACCGCTTGTACGACGTGGAGGTGATTG  
53 AGCATAGTCCGGATATTAGTTTCCTCGTGGTGTGTCCATCCGCCGAGTCCCTCATGCGCTGTGCC  
54 CCGTCAGTCTGAGTTACTGCTACAGCGAGATGACTTGGCCAGCTTGAGTATCCAGGCCTTTGAG  
55 ATGATTCACCTGCGCACTTATCAGCCGGCCATCATTGAGAAGTACGCCCGTTTATCTTGCAATCC  
56 TTGAATTGGATAACCGCACTGGCCACACATTCGCTTCGCGAGGCATTCTCCAGCAGTGAAGTGA  
57 GCGGCAAGGAACGTTTGGCCACGCTGCAGGAGCTCAGTGCAGTCTTACGATTGTGTGGAAA  
58 AGTGTGCGATGGCTAATGGATGTGGTGGCATAATGCGCGAAAACAAAACGCTCAACCCTCGTTGG  
59 CTATGCGAGAAATTCTGGACTTTGCACAGCAAAGACAGGACGAAGCGGTAGCGACATCGGCAGG  
60 AGGTTCGCGAACAACAGCTGCTGCAGCTGCCATCCGCGAGAGCAAGTTCTCCAAGACGGGC  
61 CAGGGAAGAGGCAGTTGGCCGGGACCGGAACTAGTGAAGATCAATCGCAGAACAAGCCGGAGC  
62 ACTCCAAGTCTGAACAGAATCTGGAAGTGAAGTATCACGCCAGTGGAACTGCATCCAATCA  
63 AGTTCCTACACAGCAGCAGCAGCCGCAGCAGCAATCGCAGCAACAGCAACTCTTACAAGTTTCC  
64 AACATCAGCGAATACGCGGGATCGATTTGCTCAGAAGTATCATTTAGGAAGAATAGTGGCGATT  
65 CCATGAGCTCCACCTACACGTCCCGGAGCTTCTACTCTGCCGTGGACTCAGCCTCAGATGGAAA  
66 TAGCACAACAGTGTGTTTGGCATTCCGCCCTCTCGTTCCGACGACACTCTGGCGGATGCACTG  
67 CGCCACTCGCAAGCGGTAGCTGCGCAACGCAAACGAACCAGCTCTAATATCGCATCTCATAACCA  
68 ATCCCTTGATTACGGTGCACAGCTCTAGTTCCGGTCCGTACCTGGCTGGATCCAGTGTTCCTT  
69 GAGAAGCGGCAACGGAGCCTTCGCAACGGATTTGGAGCACAAACCGCTGAAGCCAGCGACAAAG  
70 GCTGCATCTAGTGCAAACCTGCGCGAAGGTGGACCCTATTTGAAAAGCACGTTAGCTGAACTAC  
71 GAGCTGTTGGAGGTGAGGAGCCGGTGGCCAGTACTTCAAAGGCCTCTTCGATGAAGAGCTTGTC  
72 GCGGCAGAGCAGCGAAGAGGATTCCGCCAGCTGTTCCAGTCTCAACGCAGAGCAGACATCGGGG  
73 ATCATTCAAGTCTATACCGCCTACAGTACGGGTCTGGCCAGTGGAAACCAGCTTAAAGATTCAGC  
74 TAACTCCGAAGACGACTGCCCCGGAAGTGATCAACCTGGTGGTGAAGCAACTTAACATGGCCGT  
75 GGTTCCAAAGGGAACAATGGCCCCATCTATGGACCCGAGATGCTAGAGAACTTTGCCTGGTT  
76 GCGGTGATTGGAGCAAGGGAACGCTGCCTGCGAGATGACTTCAAACCGCTGCAACTGCAGAATC  
77 CCTGGAAGAAGGGCCGTCTGTACGTCCGCAAGAAGCATGAGCTGCTGGCGGCCATCGAACACTC  
78 GAATCGGAAATCGCATTTGTTACCCTTACGACGTGCCTGACTACGCAATCTGA**GGTACC**  
79

80 **Supplementary Data 3.** DNA sequence synthesized for *UAS-wake-RG<sub>HA</sub>* generation. *KpnI*  
81 restriction sites are indicated using boxes. The HA epitope tag coding region is underlined, and  
82 the start and stop codons are indicated in bold.
